# Supplementary material for: Dual-mode colorimetric and fluorescence detection of BRCA1 based on a CRISPR-Cas12a system
Source: Royal Society of Chemistry journal article supplement (doi:10.1039/d4an01035c), 2024-01-01
Supplement: d4an01035c1.pdf [file d4an01035c1.pdf]

1  
2  
3  
4  
5  
6  
7  
8  
9  
10  
11  
12  
13  
14  
15  
16  
17  
18  
19  
20  
21  
22  
23  
24  
25  
26

## Supporting Information

### **Dual-mode colorimetric and fluorescent detection of BRCA1 based on a CRISPR-Cas12a system**

Chengchen Tan<sup>†</sup>, Xiaolong Yan<sup>†</sup>, Xingchang Lu, Jianxiu Wang <sup>\*</sup>, Xinyao Yi <sup>\*</sup>

Hunan Provincial Key Laboratory of Micro & Nano Materials Interface Science, College of  
Chemistry and Chemical Engineering, Central South University, Changsha, Hunan 410083, P.  
R. China

**\*Corresponding Author**

Email address: [jxiuwang@csu.edu.cn](mailto:jxiuwang@csu.edu.cn) (Jianxiu Wang); [yixinyao@csu.edu.cn](mailto:yixinyao@csu.edu.cn) (Xinyao Yi)

28 **Table S1.** Sequences of the oligonucleotides used in this work.

| Oligonucleotides | Sequence (from 5' to 3')                     |
|------------------|----------------------------------------------|
| crRNA            | UAAUUUCUACUAAGUGUAGAU<br>UGAUUUUCUCCUUUUGUUC |
| BRCA1            | GAACAAAAGGAAGAAAATCA                         |
| SM-BRCA1         | GAACAAAAGGAATAAAATCA                         |
| DM-BRCA1         | GAACAAAACGAATAAAATCA                         |
| TM-BRCA1         | CAACAAAACGAATAAAATCA                         |
| Random           | CCTTGTTGGACTCCCTTCTA                         |

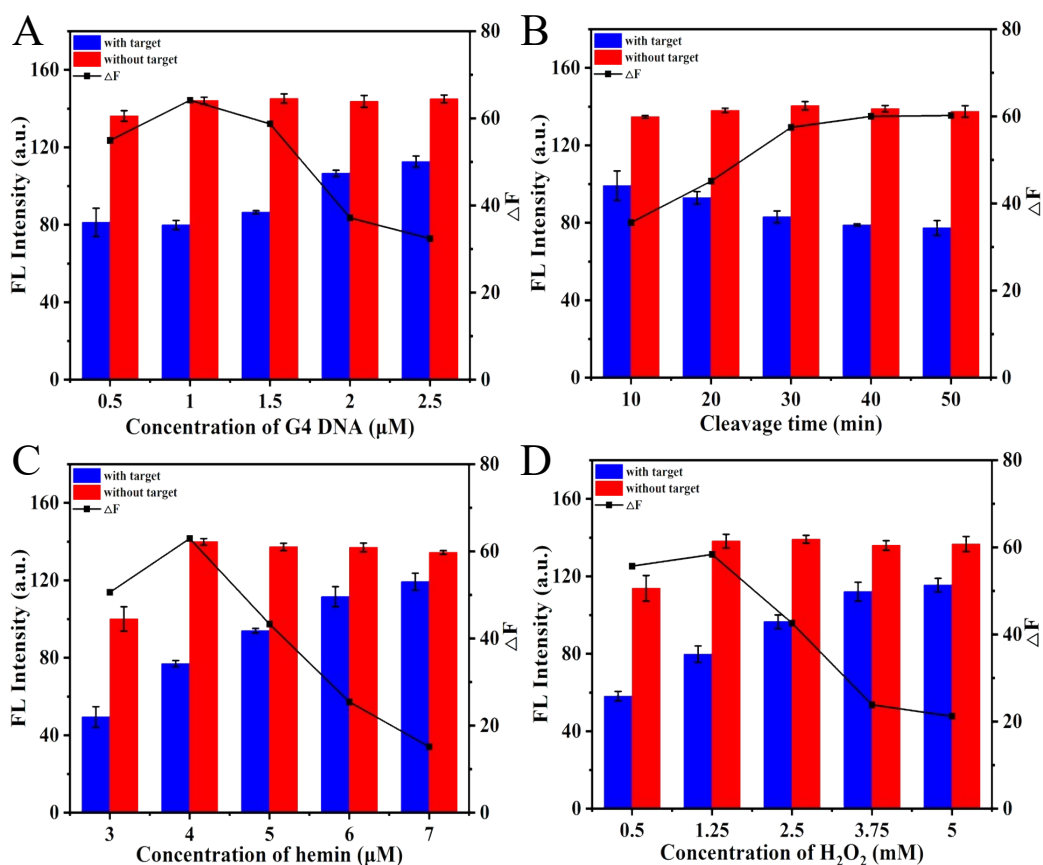

30

31 **Fig. S1** Optimization of (A) the concentration of G4 DNA, (B) the cleavage time, (C)  
 32 the concentration of hemin and (D) the concentration of  $\text{H}_2\text{O}_2$ .  $\Delta F = F_0 - F$ , where  $F_0$   
 33 and  $F$  were the fluorescence intensity of the system without and with BRCA1,  
 34 respectively. The error bars represented the standard deviation for three replicate  
 35 measurements.

36

37 **Table S2.** Determination of BRCA1 in human serum samples diluted at different  
 38 multiples (n=3)

| <b>Readout<br/>modes</b> | <b>Serum<br/>dilution<br/>ratio</b> | <b>Spiked<br/>(nM)</b> | <b>Found<br/>(nM)</b> | <b>Recovery<br/>(%)</b> | <b>RSD (%)</b> |
|--------------------------|-------------------------------------|------------------------|-----------------------|-------------------------|----------------|
| Fluorimetry              | buffer                              |                        | 5.138                 | 102.8                   | 0.50           |
|                          | 5                                   | 5                      | 3.547                 | 70.9                    | 2.69           |
|                          | 50                                  |                        | 4.700                 | 94.0                    | 2.39           |
|                          | 100                                 |                        | 5.080                 | 101.6                   | 3.91           |
|                          | buffer                              |                        | 4.958                 | 99.2                    | 4.02           |
| Colorimetry              | 5                                   | 5                      | 2.286                 | 45.72                   | 3.23           |
|                          | 50                                  |                        | 4.733                 | 94.7                    | 4.84           |
|                          | 100                                 |                        | 4.990                 | 99.8                    | 1.39           |
|                          | buffer                              |                        | 4.958                 | 99.2                    | 4.02           |
